# Supplementary material for: Comparative metabolomics study on the secondary metabolites of the red alga, Corallina officinalis and its associated endosymbiotic fungi
Source: Royal Society of Chemistry journal article supplement (doi:10.1039/d4ra01055h), 2024-01-01
Supplement: d4ra01055h1.pdf [file d4ra01055h1.pdf]

**Comparative Metabolomics Study on the Secondary Metabolites of the Red Alga, *Corallina officinalis* and its Associated Endosymbiotic Fungi**

Sherif M Shama <sup>a</sup>, Ahmed M. Elissawy <sup>b,c</sup>, Mohamed A. Salem <sup>a</sup>, Fadia S. Youssef <sup>b</sup>, Mohamed S. Elnaggar <sup>b</sup>, Hesham R. El-Seedi <sup>d,e,f</sup>, Shaden A. M. Khalifa<sup>g</sup>, Khaled Briki <sup>h</sup>, Dalia Ibrahim Hamdan <sup>a</sup> and Abdel Nasser B. Singab<sup>b,c\*</sup>

<sup>a</sup> *Department of Pharmacognosy and Natural Products, Faculty of Pharmacy, Menoufia University, Shibin Elkom, 32511, Egypt.*

<sup>b</sup> *Department of Pharmacognosy, Faculty of Pharmacy, Ain-Shams University, Cairo 11566, Egypt.*

<sup>c</sup> *Center of Drug Discovery Research and Development, Ain-Shams University, Cairo 11566, Egypt.*

<sup>d</sup> *International Research Center for Food Nutrition and Safety, Jiangsu University, Zhenjiang 212013, China*

<sup>e</sup> *Pharmacognosy Group, Department of Pharmaceutical Biosciences, Uppsala University, Biomedical Centre, Box 591, SE 751 24 Uppsala, Sweden.*

<sup>f</sup> *International Joint Research Laboratory of Intelligent Agriculture and Agri-Products Processing, Jiangsu Education Department, Jiangsu University, Nanjing 210024, China*

<sup>g</sup> *Psychiatry and Neurology Department, Capio Saint Göran's Hospital, Sankt Göransplan 1, 112 19 Stockholm, Sweden*

<sup>h</sup> *Laboratory of organic chemistry and natural substance, University Ziane Achour, Djelfa, Algeria*

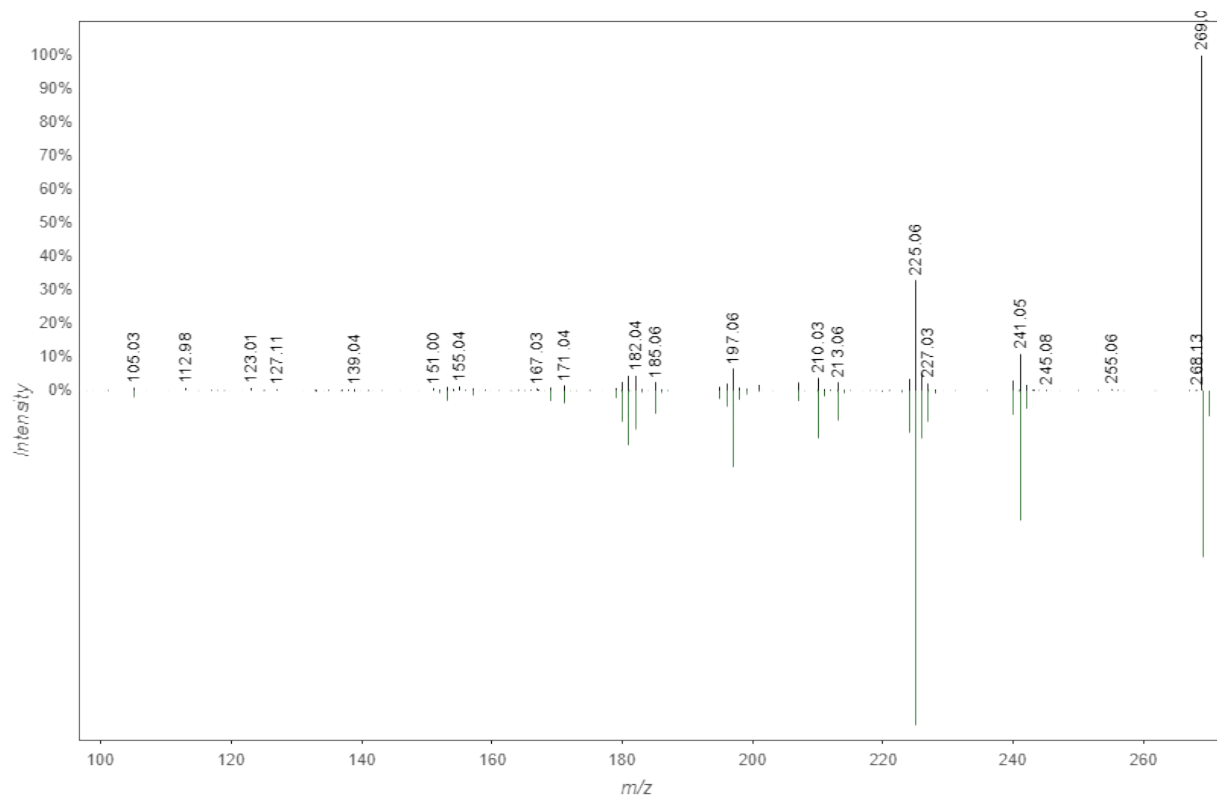

**Figure S1.** MS/MS spectrum (upper part) mirror matched of with GNPS library (lower part) of Emodin identified from *Aspergillus nidulans* as analyzed by LC/MS in negative ionization mode.

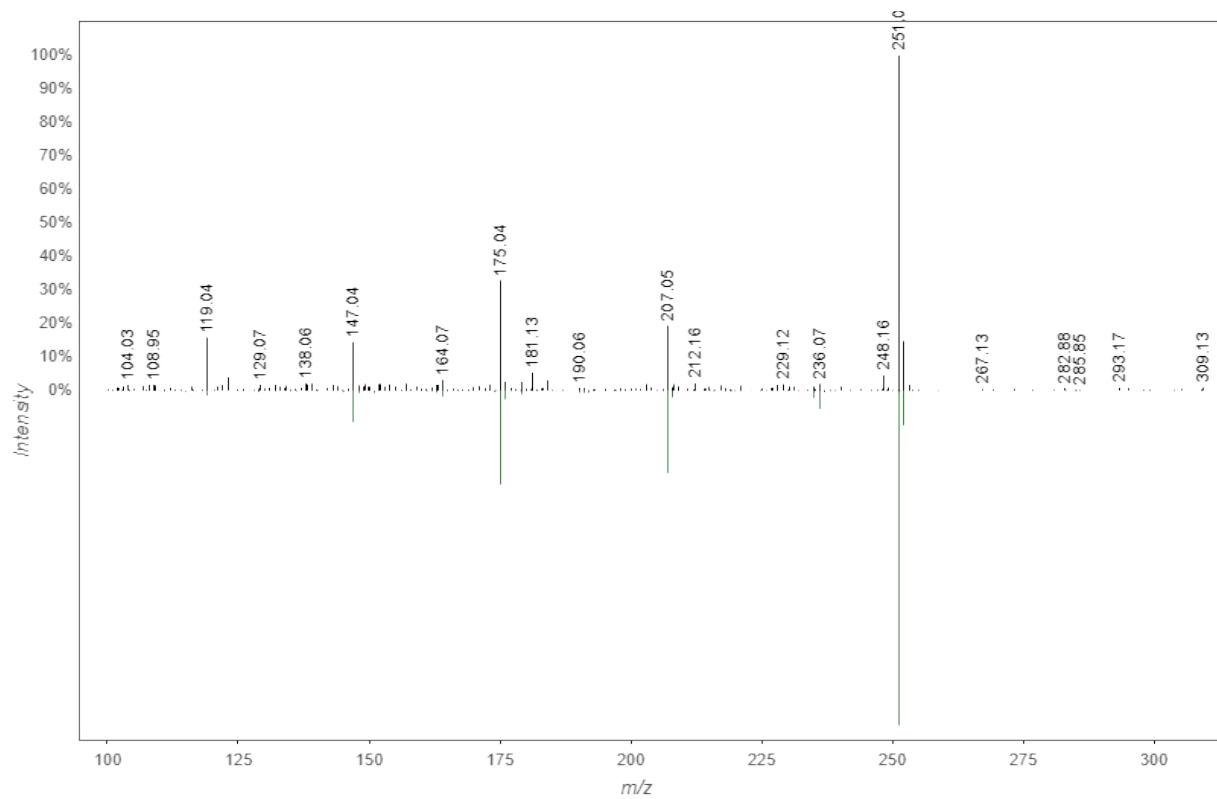

**Figure S2.** MS/MS spectrum (upper part) mirror matched of with GNPS library (lower part) of Sinapine identified from *Aspergillus flavus* as analyzed by LC/MS in positive ionization mode.

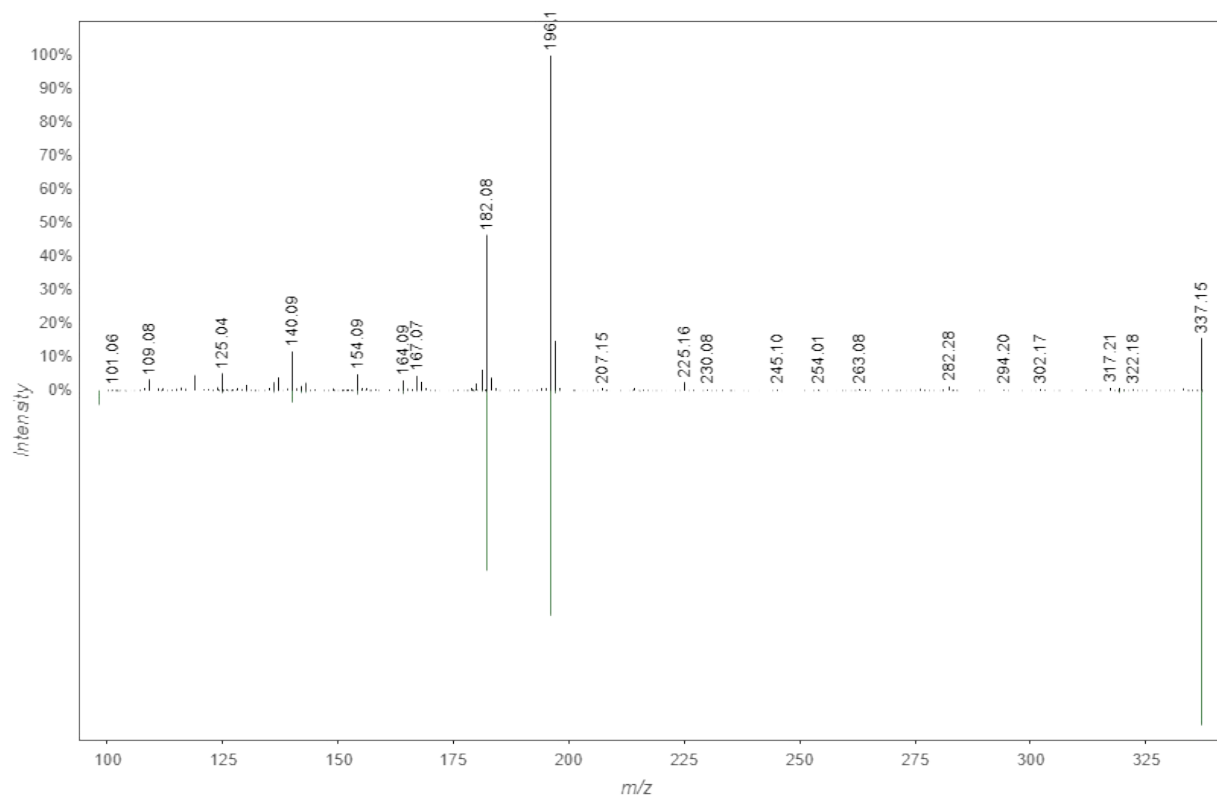

**Figure S3.** MS/MS spectrum (upper part) mirror matched of with GNPS library (lower part) of Cyclopiazonic acid identified from *Aspergillus flavus* as analyzed by LC/MS in positive ionization mode.

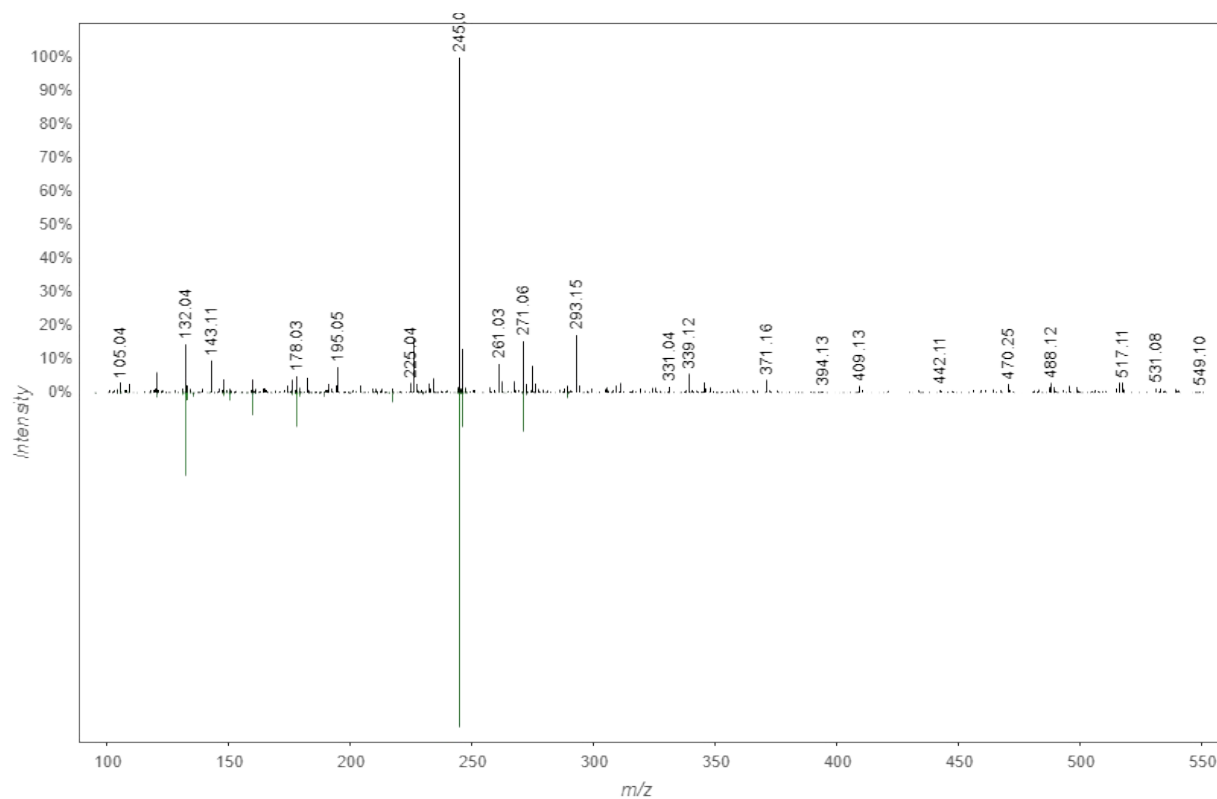

**Figure S4.** MS/MS spectrum (upper part) mirror matched of with GNPS library (lower part) of Dethiosecoemestrin identified from *Aspergillus nidulans* as analyzed by LC/MS in positive ionization mode.

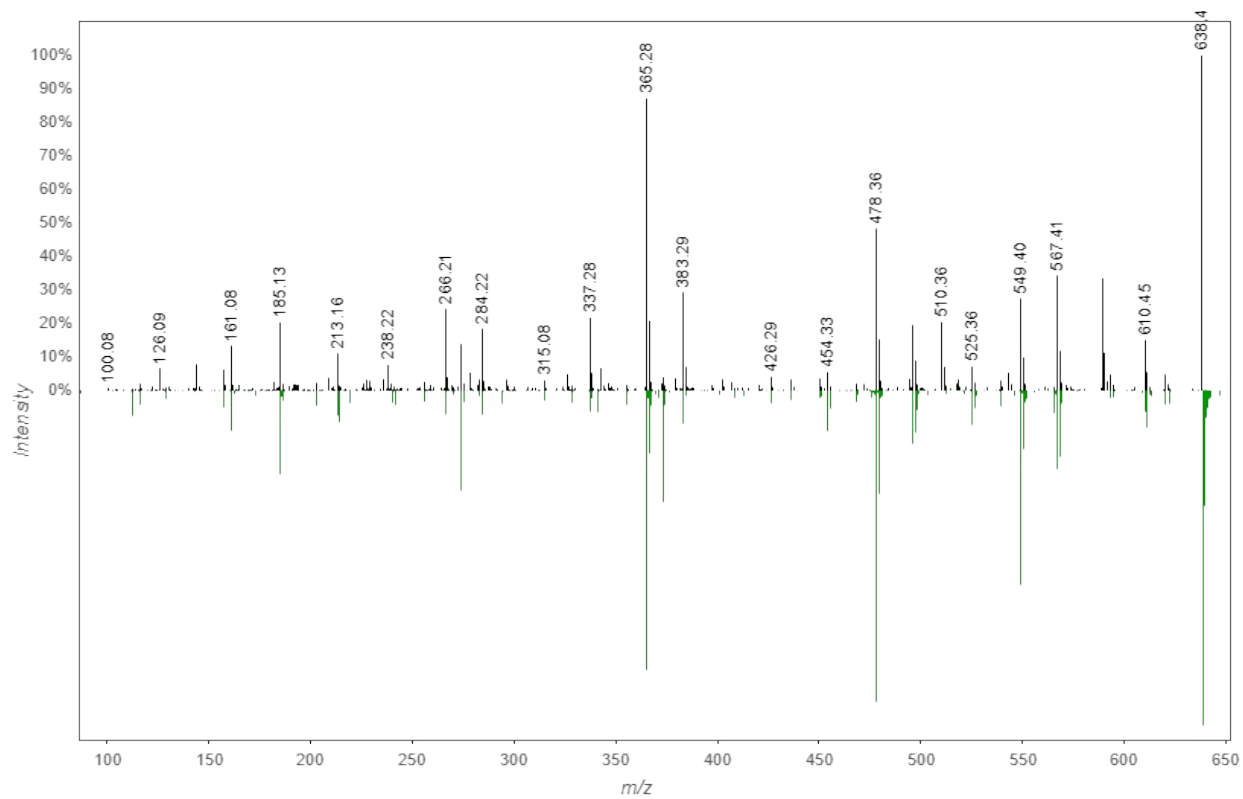

**Figure S5.** MS/MS spectrum (upper part) mirror matched of with GNPS library (lower part) of Scopularide E identified from *Aspergillus nidulans* as analyzed by LC/MS in positive ionization mode.

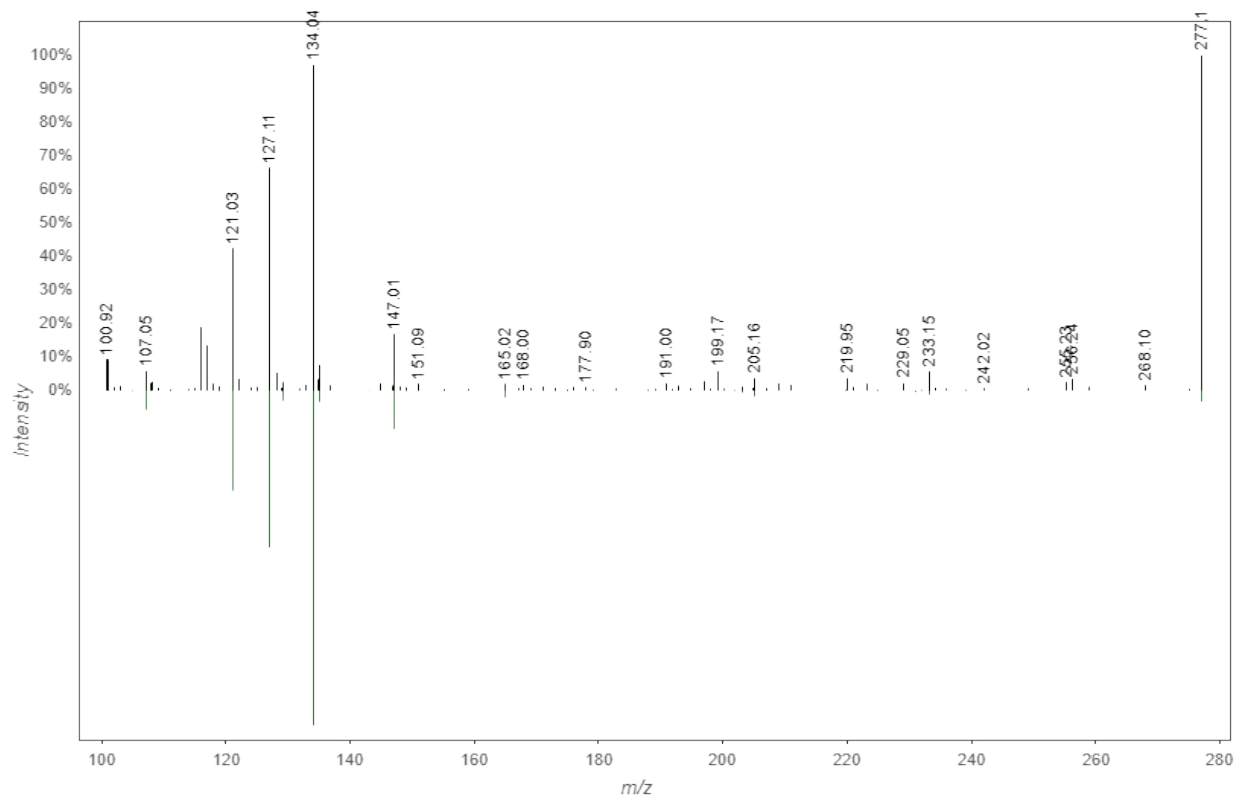

**Figure S6.** MS/MS spectrum (upper part) mirror matched of with GNPS library (lower part) of 2-(((2-Ethylhexyl) oxy) carbonyl) benzoic acid identified from *Aspergillus flavus* as analyzed by LC/MS in negative ionization mode.

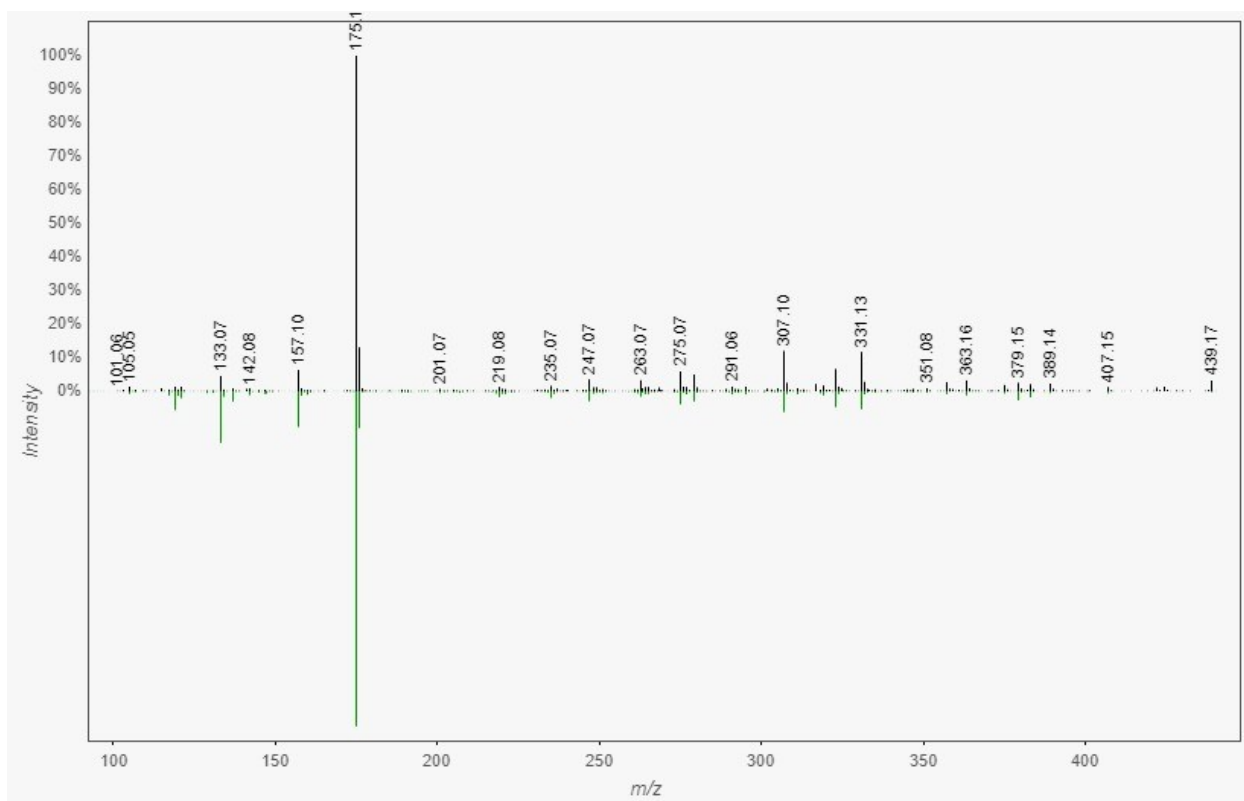

**Figure S7.** MS/MS spectrum (upper part) mirror matched of with GNPS library (lower part) of Butyrolactone VII identified from *Aspergillus flavipes* as analyzed by LC/MS in positive ionization mode.



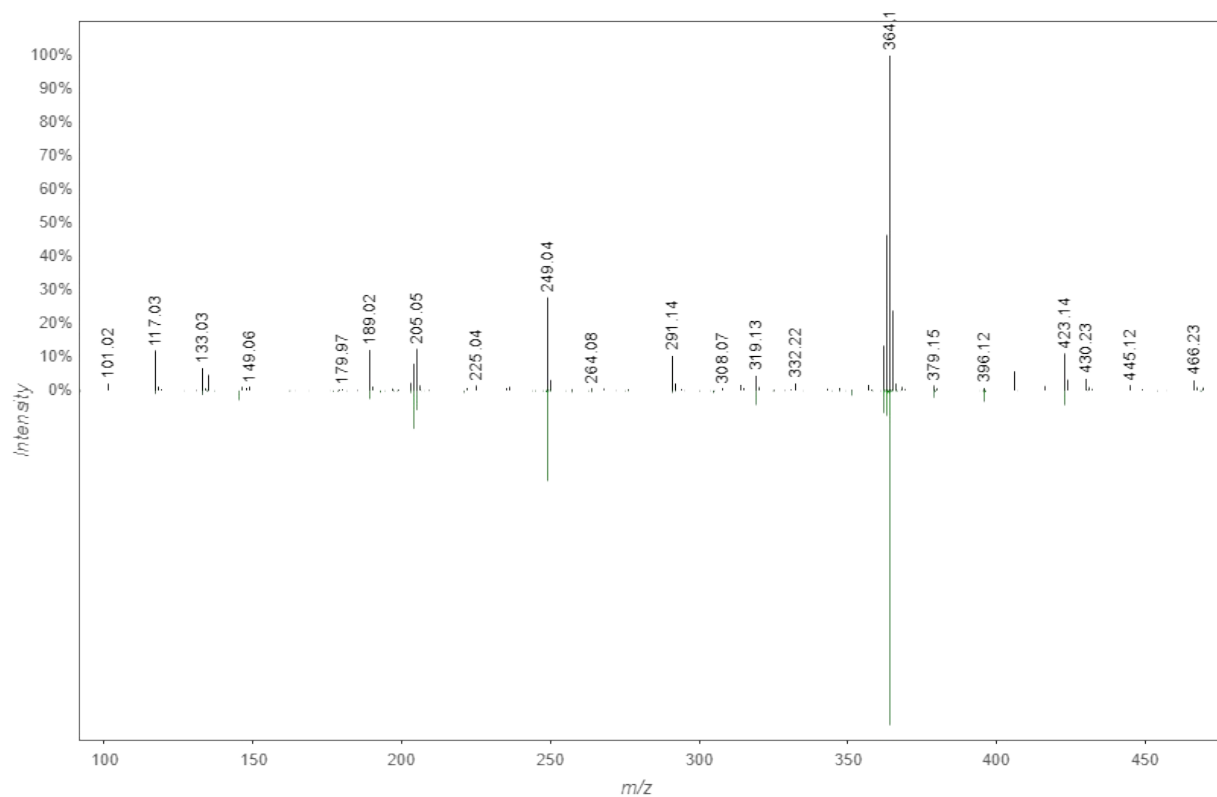

**Figure S8.** MS/MS spectrum (upper part) mirror matched of with GNPS library (lower part) of Butyrolactone I identified from *Aspergillus flavipes* as analyzed by LC/MS in negative ionization mode.

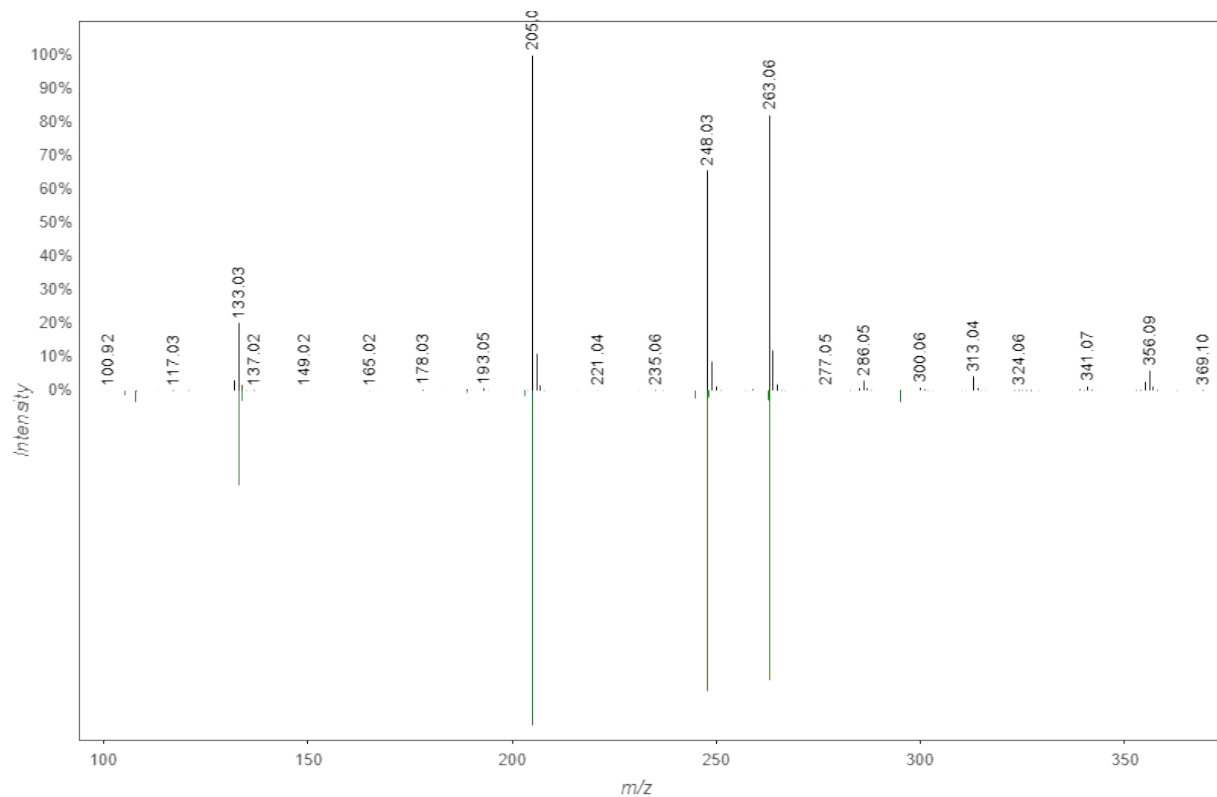

**Figure S9.** MS/MS spectrum (upper part) mirror matched of with GNPS library (lower part) of 2-O-methylbutyrolactone II identified from *Aspergillus flavipes* as analyzed by LC/MS in negative ionization mode.

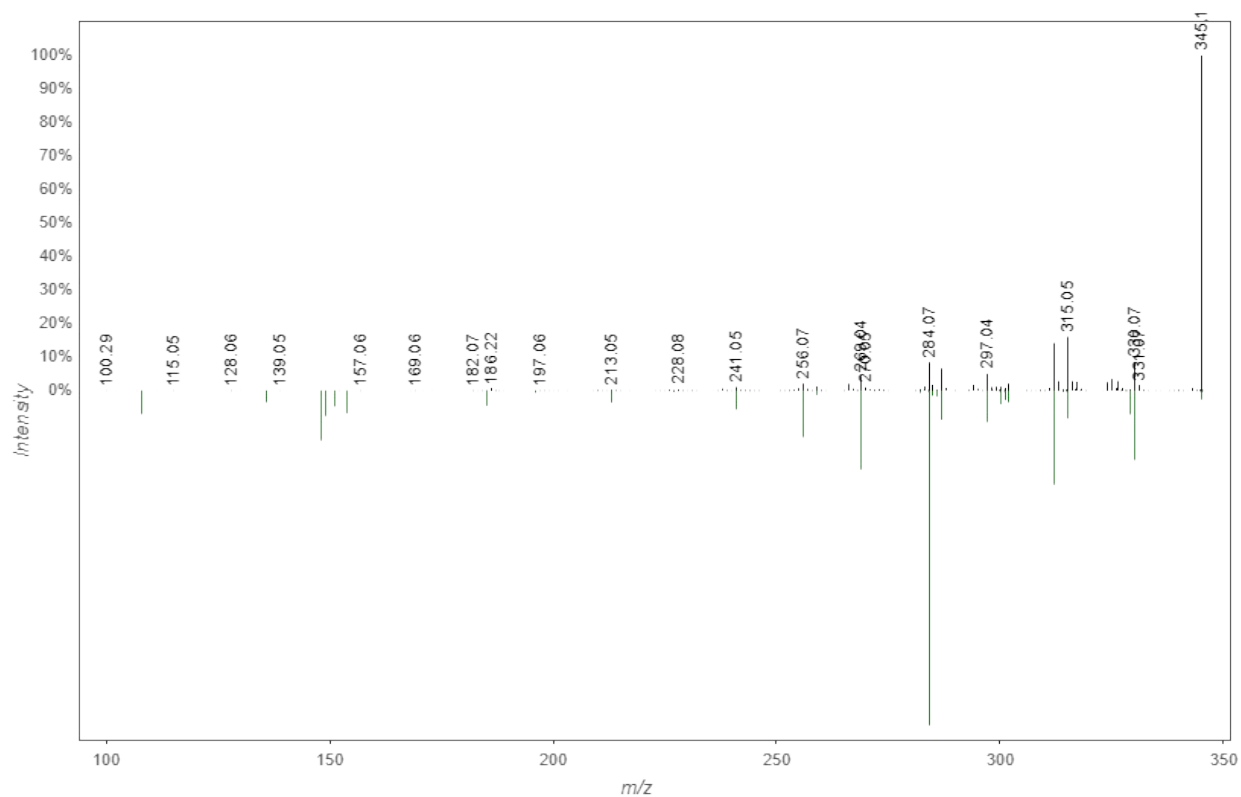

**Figure S10.** MS/MS spectrum (upper part) mirror matched of with GNPS library (lower part) of 5,2'-Dihydroxy-3,7,8-trimethoxyflavone identified from *Aspergillus flavipes* as analyzed by LC/MS in positive ionization mode.

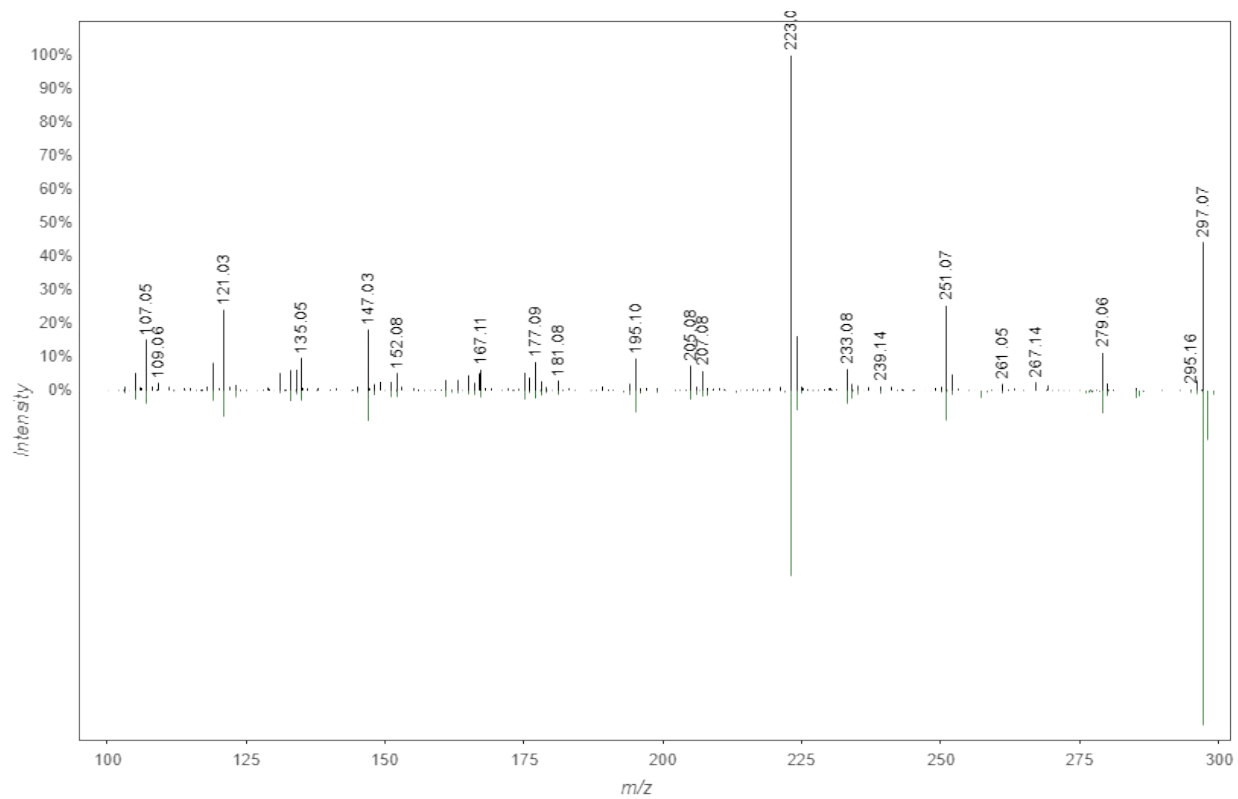

**Figure S11.** MS/MS spectrum (upper part) mirror matched of with GNPS library (lower part) of Aspulvinone E identified from *Aspergillus flavipes* as analyzed by LC/MS in positive ionization mode.

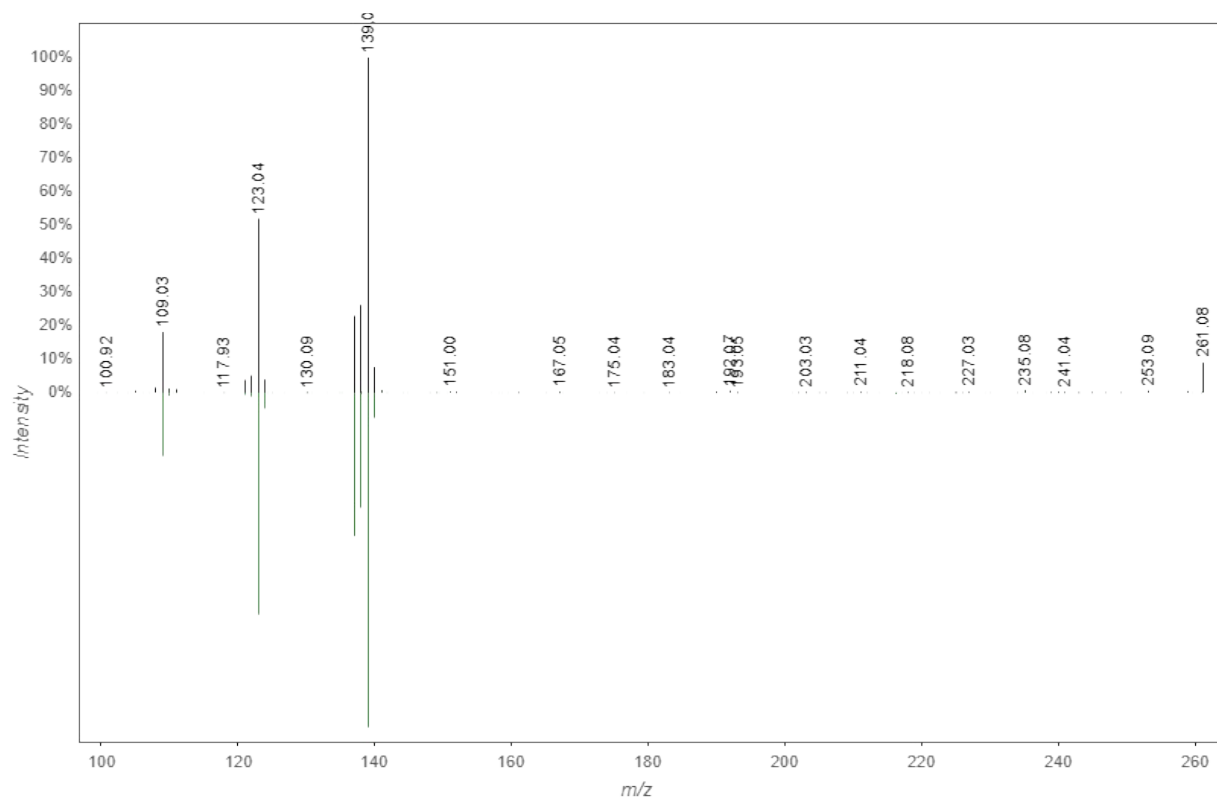

**Figure S12.** MS/MS spectrum (upper part) mirror matched of with GNPS library (lower part) of violaceol I identified from *Aspergillus nidulans* as analyzed by LC/MS in negative ionization mode.

**Table S1. Detailed annotation of metabolites detected in the ethyl acetate extracts of the red alga, *C. officinalis*, and associated Endosymbiotic fungi namely, *A. flavus*, *A. nidulans*, and *A. flavipes* using UPLC-MS/MS Analysis in both positive and negative modes.**

| Peak no. | tR (min) | Annotated Compound                  | Adducts                                  | m/z                    | MS/MS                                                                                                        | Elemental Composition                           | Ref.         |
|----------|----------|-------------------------------------|------------------------------------------|------------------------|--------------------------------------------------------------------------------------------------------------|-------------------------------------------------|--------------|
| 1.       | 4.06     | Orsellinic acid                     | [M-H] <sup>-</sup>                       | 167.03418              | 123.0443, 152.0108, 151.0393, 137.0237, 121.0285                                                             | C <sub>8</sub> H <sub>8</sub> O <sub>4</sub>    | <sup>1</sup> |
| 2.       | 4.14     | <i>p</i> -hydroxyphenyl acetic acid | [M+H] <sup>+</sup>                       | 153.0546               | 131.9639, 113.9639, 105.0702                                                                                 | C <sub>8</sub> H <sub>8</sub> O <sub>3</sub>    | <sup>2</sup> |
| 3.       | 4.17     | 5-hydroxyaverantin                  | [M+H] <sup>+</sup>                       | 389.1238               | 357.0978, 331.1364, 291.1412, 226.8936, 208.8831, 174.9832, 146.9615, 131.9743, 128.9508, 113.9639           | C <sub>20</sub> H <sub>20</sub> O <sub>8</sub>  | GNPS         |
| 4.       | 5.09     | Terrein                             | [M-H] <sup>-</sup>                       | 153.05495              | 151.0392, 123.0442, 135.0442                                                                                 | C <sub>8</sub> H <sub>10</sub> O <sub>3</sub>   | GNPS         |
| 5.       | 5.13     | 3-methylorsellinicacid              | [M+H] <sup>+</sup>                       | 183.0652               | 179.0336, 158.0599, 152.0421, 151.0388, 137.0596, 132.0443, 130.0651, 113.9638, 109.0650, 103.0545           | C <sub>9</sub> H <sub>10</sub> O <sub>4</sub>   | <sup>3</sup> |
| 6.       | 5.20     | Kojic acid methyl ether             | [M-H] <sup>-</sup><br>[M+H] <sup>+</sup> | 155.03419<br>157.04964 | 153.0357, 151.0394, 146.9379, 135.0444,<br>132.8671, 123.0443                                                | C <sub>7</sub> H <sub>8</sub> O <sub>4</sub>    | <sup>4</sup> |
| 7.       | 5.33     | Insulicolide A                      | [M+H] <sup>+</sup>                       | 432.1655               | 417.1415, 349.1830, 279.0736, 261.0630, 248.0914, 239.0816, 209.0441, 195.0285, 181.0493, 138.0310, 113.9638 | C <sub>22</sub> H <sub>25</sub> NO <sub>8</sub> | <sup>5</sup> |

|     |      |                    |                    |           |                                                                                                          |                                                               |      |
|-----|------|--------------------|--------------------|-----------|----------------------------------------------------------------------------------------------------------|---------------------------------------------------------------|------|
| 8.  | 5.45 | Orsellinaldehyde   | [M-H] <sup>-</sup> | 151.03934 | 123.0442, 133.0286, 124.0476, 121.0286                                                                   | C <sub>8</sub> H <sub>8</sub> O <sub>3</sub>                  | 6    |
|     |      |                    | [M+H] <sup>+</sup> | 153.05469 |                                                                                                          |                                                               |      |
| 9.  | 5.63 | Sinapine           | [M] <sup>+</sup>   | 310.16489 | 251.0912, 207.0651, 175.0389, 147.0421,<br>146.9614, 131.9743, 116.9722, 113.9639                        | C <sub>16</sub> H <sub>24</sub> NO <sub>5</sub>               | GNPS |
| 10. | 6.18 | N-acetyl-L-leucine | [M-H] <sup>-</sup> | 172.09734 | 112.9848, 130.0866, 135.0306, 109.0650,<br>121.0287                                                      | C <sub>8</sub> H <sub>15</sub> NO <sub>3</sub>                | GNPS |
| 11. | 6.43 | Penidiamide        | [M-H] <sup>-</sup> | 333.1375  | 119.0493, 129.0007, 149.0432, 199.0432,<br>211.1450, 229.0904                                            | C <sub>19</sub> H <sub>18</sub> N <sub>4</sub> O <sub>2</sub> | GNPS |
| 12. | 6.60 | Asperflavin        | [M+H] <sup>+</sup> | 289.1069  | 285.0753, 257.0807, 236.0914, 223.0598,<br>179.0337, 151.0389, 131.9742, 121.0285,<br>113.9639, 107.0494 | C <sub>16</sub> H <sub>16</sub> O <sub>5</sub>                | 7    |
| 13. | 6.78 | Phenylalanine      | [M-H] <sup>-</sup> | 164.0710  | 147.0444, 134.8646, 132.8671, 116.9276,<br>112.9847                                                      | C <sub>9</sub> H <sub>11</sub> NO <sub>2</sub>                | GNPS |
| 14. | 6.92 | Speradine D        | [M+H] <sup>+</sup> | 387.1551  | 260.0880, 220.0957, 194.0802, 179.0565,<br>151.0745, 121.0644                                            | C <sub>20</sub> H <sub>22</sub> N <sub>2</sub> O <sub>6</sub> | 8    |
| 15. | 6.92 | Cichorine          | [M+H] <sup>+</sup> | 194.0810  | 179.0565, 165.0538, 151.0745, 123.0675,<br>121.0644                                                      | C <sub>10</sub> H <sub>11</sub> NO <sub>3</sub>               | 9    |
| 16. | 7.71 | Ferulic acid       | [M-H] <sup>-</sup> | 193.0501  | 178.02520, 176.0450, 149.05910                                                                           | C <sub>10</sub> H <sub>10</sub> O <sub>4</sub>                | 10   |
|     |      |                    | [M+H] <sup>+</sup> | 195.0651  | 180.04380, 177.05580, 147.04610                                                                          |                                                               |      |
| 17. | 7.71 | Nidulol            | [M+H] <sup>+</sup> | 195.0651  | 189.0541, 180.0412, 165.0542, 162.0308,<br>151.0386, 147.0437, 137.0593, 119.0491,                       | C <sub>10</sub> H <sub>10</sub> O <sub>4</sub>                | 11   |

|     |      |                                            |                                           |                      |                                                                                                          |                                                |      |
|-----|------|--------------------------------------------|-------------------------------------------|----------------------|----------------------------------------------------------------------------------------------------------|------------------------------------------------|------|
|     |      |                                            |                                           |                      | 109.0649, 107.0493                                                                                       |                                                |      |
| 18. | 7.97 | 2-O-methyl-9-dehydroxyeurotinone           | [M-H] <sup>-</sup><br>[M+H] <sup>+</sup>  | 285.0771<br>287.0914 | 135.0444, 147.0444, 214.0873, 179.0345,<br>119.0493                                                      | C <sub>16</sub> H <sub>14</sub> O <sub>5</sub> | 12   |
| 19. | 8.36 | Asperfuranone                              | [M+H] <sup>+</sup>                        | 333.1702             | 241.1539, 206.1408, 191.1174, 169.0968,<br>152.0941, 137.0707, 110.0476                                  | C <sub>19</sub> H <sub>24</sub> O <sub>5</sub> | 13   |
| 20. | 8.40 | 4-Hydroxyphenylpyruvic acid                | [M-H] <sup>-</sup>                        | 179.0341             | 108.0207, 121.0286, 135.0305, 115.0391                                                                   | C <sub>9</sub> H <sub>8</sub> O <sub>4</sub>   | GNPS |
| 21. | 8.66 | Homogenentisic acid                        | [M-H] <sup>-</sup>                        | 167.0339             | 112.9845, 116.9275, 132.8669, 134.8642,<br>136.8623                                                      | C <sub>8</sub> H <sub>8</sub> O <sub>4</sub>   | GNPS |
| 22. | 8.69 | Alternariol monomethyl ether               | [M-H] <sup>-</sup>                        | 271.0612             | 269.0699, 228.0429, 207.0298, 176.0349,<br>148.0398, 137.0237, 122.0366, 107.0368                        | C <sub>15</sub> H <sub>12</sub> O <sub>5</sub> | 14   |
| 23. | 8.96 | Daidzein                                   | [M-H] <sup>-</sup>                        | 253.0509             | 224.0475, 208.0523, 208.0526, 133.0332,<br>145.0501, 112.9847                                            | C <sub>15</sub> H <sub>10</sub> O <sub>4</sub> | GNPS |
| 24. | 9.02 | Sterigmatocystin hemiacetal                | [M-H] <sup>-</sup><br>[[M+H] <sup>+</sup> | 341.0673<br>343.0811 | 325.0690, 269.0794, 237.0523, 179.0330,<br>161.0225, 147.0433, 133.0278, 121.0280,<br>105.0333           | C <sub>18</sub> H <sub>14</sub> O <sub>7</sub> | 15   |
| 25. | 9.20 | Erythroglauclin                            | [M+Na] <sup>+</sup>                       | 301.0705             | 295.0965, 287.0540, 257.0801, 231.0642,<br>194.0807, 179.0698, 165.0544, 151.0385,<br>123.0439, 109.0284 | C <sub>16</sub> H <sub>12</sub> O <sub>6</sub> | 16   |
| 26. | 9.22 | 1-hydroxy-6-methyl-8-hydroxymethylxanthone | [M+H] <sup>+</sup>                        | 257.0807             | 239.0695, 229.0853, 211.0753, 206.0806,<br>201.0904, 193.0491, 169.0643, 165.0543,                       | C <sub>15</sub> H <sub>12</sub> O <sub>4</sub> | GNPS |



|     |      |                                                                                              |                                          |                      |                                                                                                                                           |                                                               |               |
|-----|------|----------------------------------------------------------------------------------------------|------------------------------------------|----------------------|-------------------------------------------------------------------------------------------------------------------------------------------|---------------------------------------------------------------|---------------|
|     |      |                                                                                              |                                          |                      | 152.0616, 141.0695, 121.0283, 115.0542,<br>107.0492                                                                                       |                                                               |               |
| 27. | 9.32 | 2,3,6,8,9-pentahydroxy-1-oxo-3-(2-oxopropyl)-1,2,3,4-tetra-hydroanthracene-2-carboxylic acid | [M-H] <sup>-</sup><br>[M+H] <sup>+</sup> | 375.0727<br>377.0865 | 376.1639, 364.2257, 354.2414, 344.2206,<br>340.2262, 285.0746, 269.1525, 257.0797,<br>220.1686, 138.0908, 133.0853, 119.0853,<br>113.9635 | C <sub>18</sub> H <sub>16</sub> O <sub>9</sub>                | GNPS          |
| 28. | 9.39 | Sterigmatocystin                                                                             | [M-H] <sup>-</sup><br>[M+H] <sup>+</sup> | 323.0564<br>325.0707 | 307.0585, 279.0637, 251.0690, 223.0589,<br>161.0225, 133.0278, 123.0800, 107.0490                                                         | C <sub>18</sub> H <sub>12</sub> O <sub>6</sub>                | 15, 17, 18    |
| 29. | 9.45 | Atrochryson carboxylic acid                                                                  | [M-H] <sup>-</sup><br>[M+H] <sup>+</sup> | 317.0665<br>319.0813 | 286.0486, 300.0640, 379.1588, 116.927,<br>253.2539, 183.0116                                                                              | C <sub>16</sub> H <sub>14</sub> O <sub>7</sub>                | GNPS          |
| 30. | 9.70 | Aspergilloid C                                                                               | [M-H] <sup>-</sup>                       | 279.1242             | 217.1234, 177.0916, 147.0444, 112.9847                                                                                                    | C <sub>15</sub> H <sub>20</sub> O <sub>5</sub>                | <sup>19</sup> |
| 31. | 9.77 | Violaceol i                                                                                  | [M-H] <sup>-</sup>                       | 261.0773             | 139.0393, 261.0772, 207.0298, 123.0443,<br>109.0343                                                                                       | C <sub>14</sub> H <sub>14</sub> O <sub>5</sub>                | GNPS          |
| 32. | 9.80 | Versiquinazoline E                                                                           | [M+H] <sup>+</sup>                       | 444.1651             | 401.1199, 376.1382, 354.1332, 338.1007,<br>313.1422, 271.0598, 264.1225, 206.0806,<br>193.0492, 179.0544, 165.0544, 151.0749,<br>113.9637 | C <sub>24</sub> H <sub>21</sub> N <sub>5</sub> O <sub>4</sub> | <sup>20</sup> |
| 33. | 9.93 | Aspulvinone E                                                                                | [M+H] <sup>+</sup>                       | 297.0759             | 279.0640, 251.0693, 233.0845, 223.0745,<br>205.0821, 195.1042, 177.0935, 147.0433,<br>121.0743, 107.0491                                  | C <sub>17</sub> H <sub>12</sub> O <sub>5</sub>                | GNPS          |

|     |       |                                  |                                   |          |                                                                                                          |                                                                               |      |
|-----|-------|----------------------------------|-----------------------------------|----------|----------------------------------------------------------------------------------------------------------|-------------------------------------------------------------------------------|------|
| 34. | 10.02 | Aspergiterpenoid A               | [M+H] <sup>+</sup>                | 237.1848 | 207.1488, 191.1176, 177.1018, 165.1020,<br>163.0863, 137.0708, 120.0808, 113.9638                        | C <sub>15</sub> H <sub>24</sub> O <sub>2</sub>                                | 21   |
| 35. | 10.08 | Epicoccolide B                   | [M+H] <sup>+</sup>                | 359.0761 | 341.0686, 313.0690, 297.0743, 285.0742,<br>251.0690, 223.0743, 147.0433, 121.0280                        | C <sub>18</sub> H <sub>14</sub> O <sub>8</sub>                                | 22   |
| 36. | 10.20 | 5-methoxydihydrosterigmatocystin | [M-H] <sup>-</sup>                | 355.0822 | 339.0843, 325.0682, 269.0791, 223.0744,                                                                  | C <sub>19</sub> H <sub>16</sub> O <sub>7</sub>                                | 15   |
|     |       |                                  | [M+H] <sup>+</sup>                | 357.0966 | 181.0487, 147.0432, 131.0277, 121.0279                                                                   |                                                                               |      |
| 37. | 10.87 | Alternariol                      | [M-H] <sup>-</sup>                | 257.0455 | 245.0822, 237.0924, 213.0556, 207.0298,<br>143.0495, 139.0394, 137.0236, 122.0365                        | C <sub>14</sub> H <sub>10</sub> O <sub>5</sub>                                | 14   |
| 38. | 11.33 | Curvularin                       | [M-H] <sup>-</sup>                | 291.1236 | 115.0755, 179.0344, 270.1350, 123.0442                                                                   | C <sub>16</sub> H <sub>20</sub> O <sub>5</sub>                                | GNPS |
| 39. | 11.96 | Aspoquinoline C                  | [M-H] <sup>-</sup>                | 482.2176 | 468.2398, 426.2294, 418.2608, 300.0643,<br>263.0564, 208.0977, 179.0344, 142.0344                        | C <sub>27</sub> H <sub>33</sub> NO <sub>7</sub>                               | 23   |
| 40. | 12.12 | Cytochalasin Z17                 | [M+H] <sup>+</sup>                | 464.2438 | 456.2343, 450.2233, 402.2633, 384.2528,<br>364.1887, 303.0851, 206.1170, 166.0857,<br>135.0800, 107.0491 | C <sub>28</sub> H <sub>33</sub> NO <sub>5</sub>                               | 24   |
| 41. | 12.35 | Dethiosecoemestrin               | [M+NH <sub>4</sub> ] <sup>+</sup> | 550.1457 | 488.1190, 319.0624, 293.1484, 271.0591,<br>245.0549, 226.2156, 179.0695, 178.0321,<br>132.0440           | C <sub>27</sub> H <sub>20</sub> N <sub>2</sub> O <sub>10</sub>                | GNPS |
| 42. | 12.58 | Emestrin                         | [M+H] <sup>+</sup>                | 599.0783 | 594.3244, 580.3612, 579.3527, 578.3495,<br>517.1217, 499.1112, 489.1264, 471.1168,                       | C <sub>27</sub> H <sub>22</sub> N <sub>2</sub> O <sub>10</sub> S <sub>2</sub> | 25   |

|     |       |                                     |                    |          |                                                                                                |                                                               |      |
|-----|-------|-------------------------------------|--------------------|----------|------------------------------------------------------------------------------------------------|---------------------------------------------------------------|------|
|     |       |                                     |                    |          | 443.1211, 415.1260, 386.1022, 285.1106,<br>257.0542, 229.0596, 201.0647, 132.0437,<br>115.0494 |                                                               |      |
| 43. | 12.67 | Cytochalasin z8                     | [M+H] <sup>+</sup> | 466.2593 | 448.2463, 430.2358, 366.2043, 356.1475,<br>303.0846, 217.0484, 166.0854, 120.0804              | C <sub>28</sub> H <sub>35</sub> NO <sub>5</sub>               | 24   |
| 44. | 12.70 | Fellutamide A                       | [M-H] <sup>-</sup> | 570.3521 | 534.1860, 518.2125, 474.2226, 416.2194,                                                        | C <sub>27</sub> H <sub>49</sub> N <sub>5</sub> O <sub>8</sub> | 26   |
|     |       |                                     | [M+H] <sup>+</sup> | 572.3651 | 356.1471, 290.1520, 240.1367, 217.0481,<br>120.0802                                            |                                                               |      |
| 45. | 12.74 | Acyl-hemiacetal<br>sterigmatocystin | [M+H] <sup>+</sup> | 385.0918 | 343.0800, 325.0694, 310.0459, 297.0748,<br>248.1270, 167.0332, 113.9635                        | C <sub>20</sub> H <sub>16</sub> O <sub>8</sub>                | 15   |
| 46. | 12.80 | Butyrolactone I                     | [M-H] <sup>-</sup> | 423.1449 | 364.1318, 319.1334, 249.0442,<br>205.0523, 179.0344, 133.0313                                  | C <sub>24</sub> H <sub>24</sub> O <sub>7</sub>                | GNPS |
| 47. | 13.27 | Butyrolactone VII                   | [M+H] <sup>+</sup> | 439.1755 | 422.2278, 331.1309, 307.0945, 275.0697,<br>217.0482, 175.1107, 166.0853, 157.1023,<br>133.0713 | C <sub>25</sub> H <sub>26</sub> O <sub>7</sub>                | GNPS |
| 48. | 13.27 | 2-O-methylbutyrolactone II          | [M-H] <sup>-</sup> | 369.0977 | 341.0669, 311.1691, 291.2005, 263.0624,<br>255.2333, 248.0335, 205.0122, 183.0116,<br>133.0326 | C <sub>20</sub> H <sub>18</sub> O <sub>7</sub>                | GNPS |
| 49. | 13.32 | Aspergillide E                      | [M+H] <sup>+</sup> | 466.22   | 347.0514, 325.0695, 310.0460, 247.1434,<br>281.0435, 282.0490, 182.0441, 195.0761,<br>219.1485 | C <sub>25</sub> H <sub>29</sub> N <sub>4</sub> O <sub>5</sub> | 27   |

|     |       |                    |                    |           |                                                                                                                                                               |                                                               |      |
|-----|-------|--------------------|--------------------|-----------|---------------------------------------------------------------------------------------------------------------------------------------------------------------|---------------------------------------------------------------|------|
| 50. | 13.40 | Emericellamide C   | [M+H] <sup>+</sup> | 596.4021  | 568.4059, 554.2728, 547.3453, 525.3638,<br>454.3265, 341.2424, 325.0686, 291.1694,<br>266.0648, 244.1647, 226.1541, 179.0697,<br>159.0912, 130.0648, 123.1166 | C <sub>30</sub> H <sub>53</sub> N <sub>5</sub> O <sub>7</sub> | 28   |
| 51. | 13.45 | Fellutamide D      | [M-H] <sup>-</sup> | 598.38153 | 582.3835, 532.2279, 456.2161, 357.1767,                                                                                                                       | C <sub>29</sub> H <sub>53</sub> N <sub>5</sub> O <sub>8</sub> | 29   |
|     |       |                    | [M+H] <sup>+</sup> | 600.39789 | 325.0664, 303.0862, 289.0688,<br>198.2206, 166.0855                                                                                                           |                                                               |      |
| 52. | 13.49 | Emodin             | [M-H] <sup>-</sup> | 269.04626 | 241.0509, 227.0331, 225.0558, 213.0642,<br>210.0304, 203.0712, 197.0621, 185.0641,<br>182.0441, 177.0190, 171.0423, 155.0455,<br>116.9276, 105.0334           | C <sub>15</sub> H <sub>10</sub> O <sub>5</sub>                | GNPS |
| 53. | 13.49 | Eurotinone         | [M+H] <sup>+</sup> | 289.07068 | 288.0609, 243.0635, 201.1624, 166.0851                                                                                                                        | C <sub>15</sub> H <sub>12</sub> O <sub>6</sub>                | 30   |
| 54. | 13.49 | Monodictyphenone   | [M+H] <sup>+</sup> | 289.07068 | 201.1636, 169.9771, 154.9900, 146.9801,<br>144.9820, 139.9877, 110.0202, 113.9638                                                                             | C <sub>15</sub> H <sub>12</sub> O <sub>6</sub>                | 31   |
| 55. | 13.72 | Cyclopiazonic acid | [M+H] <sup>+</sup> | 337.15463 | 337.1502, 216.0650, 196.1117, 182.0807,<br>140.0703                                                                                                           | C <sub>20</sub> H <sub>20</sub> N <sub>2</sub> O <sub>3</sub> | 32   |
| 56. | 13.76 | Sydonic acid       | [M-H] <sup>-</sup> | 265.14838 | 263.0565, 248.0328, 205.0139, 179.0344                                                                                                                        | C <sub>15</sub> H <sub>22</sub> O <sub>4</sub>                | 33   |
| 57. | 13.92 | Emericellamide A   | [M+H] <sup>+</sup> | 610.41785 | 582.4222, 561.3615, 539.3798, 468.3429,<br>441.2694, 355.2584, 330.0964, 325.0697,<br>301.0336, 250.0703, 216.0650, 184.0729,                                 | C <sub>31</sub> H <sub>55</sub> N <sub>5</sub> O <sub>7</sub> | 28   |

|     |       |                                             |                                          |                      |                                                                                                                              |                                                               |      |
|-----|-------|---------------------------------------------|------------------------------------------|----------------------|------------------------------------------------------------------------------------------------------------------------------|---------------------------------------------------------------|------|
|     |       |                                             |                                          |                      | 179.0729, 130.0649, 123.1167                                                                                                 |                                                               |      |
| 58. | 13.99 | Asperphenamate                              | [M+H] <sup>+</sup>                       | 507.22897            | 456.2124, 303.0862, 289.0686, 256.1317,<br>238.1213, 117.0695, 105.0333                                                      | C <sub>32</sub> H <sub>30</sub> N <sub>2</sub> O <sub>4</sub> | 34   |
| 59. | 13.99 | 2-(((2-Ethylhexyl)oxy)carbonyl)benzoic acid | [M-H] <sup>-</sup>                       | 277.14456            | 255.2333, 183.0117, 265.1483, 152.9951,<br>147.0135, 134.0365, 127.1119, 116.9276,<br>107.0542                               | C <sub>16</sub> H <sub>22</sub> O <sub>4</sub>                | GNPS |
| 60. | 14.08 | 2-methyleurotinone                          | [M-H] <sup>-</sup><br>[M+H] <sup>+</sup> | 301.0718<br>303.0862 | 286.0485, 271.0252, 243.0300                                                                                                 | C <sub>16</sub> H <sub>14</sub> O <sub>6</sub>                | 35   |
| 61. | 14.11 | Emericellamide E                            | [M+H] <sup>+</sup>                       | 624.4332             | 502.3316, 437.1952, 404.3529, 284.3313,<br>184.0734, 184.0734, 143.1180, 105.0703                                            | C <sub>32</sub> H <sub>57</sub> N <sub>5</sub> O <sub>7</sub> | 28   |
| 62. | 14.15 | 1-hexadecanoyl glycerophosphocholine        | [M+FA-H] <sup>-</sup>                    | 540.3314             | 480.3103, 311.1691, 291.2005, 255.2333,<br>183.0116                                                                          | C <sub>24</sub> H <sub>50</sub> NO <sub>7</sub> P             | GNPS |
| 63. | 14.22 | 8-Hydroxy-9,12-octadecadienoic acid         | [M-H] <sup>-</sup>                       | 295.2285             | 262.1454, 183.0117, 116.9276, 195.1387,<br>277.2177, 281.2491, 279.2334                                                      | C <sub>18</sub> H <sub>32</sub> O <sub>3</sub>                | GNPS |
| 64. | 14.25 | 6,8-O-dimethylaverantin                     | [M-H] <sup>-</sup>                       | 399.1458             | 389.0984, 354.0748, 326.0796, 370.1015,<br>384.1218                                                                          | C <sub>22</sub> H <sub>24</sub> O <sub>7</sub>                | GNPS |
| 65. | 14.25 | 5,2'-Dihydroxy-3,7,8-trimethoxyflavone      | [M+H] <sup>+</sup>                       | 345.0966             | 345.1021, 331.0744, 330.0708, 325.0655,<br>315.0655, 315.0475, 312.0605, 297.0437,<br>287.0527, 284.0657, 270.0424, 256.0721 | C <sub>18</sub> H <sub>16</sub> O <sub>7</sub>                | GNPS |
| 66. | 14.26 | Hormonemate F                               | [M-H] <sup>-</sup>                       | 607.3275             | 473.2845, 334.1821, 311.1695, 281.2492,                                                                                      | C <sub>29</sub> H <sub>52</sub> O <sub>13</sub>               | GNPS |

|     |       |                                             |                    |          |                                                                                                                                                                         |                                                               |      |
|-----|-------|---------------------------------------------|--------------------|----------|-------------------------------------------------------------------------------------------------------------------------------------------------------------------------|---------------------------------------------------------------|------|
|     |       |                                             |                    |          | 262.1456, 255.2334, 221.1547, 183.0118,<br>152.9952, 116.9276                                                                                                           |                                                               |      |
| 67. | 14.35 | Flavoglaucin                                | [M+H] <sup>+</sup> | 305.2105 | 313.2734, 277.1797, 184.0732, 137.0596,<br>122.0965, 111.0443, 104.1073                                                                                                 | C <sub>19</sub> H <sub>28</sub> O <sub>3</sub>                | 16   |
| 68. | 14.37 | Scopularide E                               | [M+H] <sup>+</sup> | 638.4491 | 610.4521, 589.3916, 567.4099, 549.3994,<br>525.3612, 478.3625, 454.3312, 383.2890,<br>365.2784, 352.1892, 337.2801, 266.2103,<br>216.0646, 213.1602, 185.1334, 161.0821 | C <sub>33</sub> H <sub>59</sub> N <sub>5</sub> O <sub>7</sub> | GNPS |
| 69. | 14.56 | Aversin                                     | [M-H] <sup>-</sup> | 367.0818 | 345.0954, 303.0850, 289.0687, 184.0725                                                                                                                                  | C <sub>20</sub> H <sub>16</sub> O <sub>7</sub>                | 18   |
|     |       |                                             | [M+H] <sup>+</sup> | 369.0964 |                                                                                                                                                                         |                                                               |      |
| 70. | 14.5  | 7-hydroxy-8,14-dimethyl-9-hexadecanoic acid | [M-H] <sup>-</sup> | 297.2439 | 281.2491, 255.2334, 183.0117, 152.9952,<br>116.9276                                                                                                                     | C <sub>18</sub> H <sub>34</sub> O <sub>3</sub>                | 36   |
| 71. | 14.69 | Isoechinulins C                             | [M+H] <sup>+</sup> | 406.2121 | 383.2023, 352.1899, 324.3251, 284.3303,<br>236.1485, 216.0650, 199.0622, 184.0728,<br>133.0856                                                                          | C <sub>24</sub> H <sub>27</sub> N <sub>3</sub> O <sub>3</sub> | 37   |
| 72. | 14.91 | Wentinoid A                                 | [M+H] <sup>+</sup> | 349.2370 | 340.3927, 291.2309, 247.2048, 216.0649,<br>199.0621, 184.0728, 177.1117, 165.0903,<br>133.0856, 121.0646, 109.1012                                                      | C <sub>21</sub> H <sub>32</sub> O <sub>4</sub>                | 38   |

|     |       |                      |                    |          |                                                                                                                    |                                                               |    |
|-----|-------|----------------------|--------------------|----------|--------------------------------------------------------------------------------------------------------------------|---------------------------------------------------------------|----|
| 73. | 15.62 | Glycerol linoleate   | [M+H] <sup>+</sup> | 355.2815 | 277.1795, 239.1481, 184.0730, 177.1120,<br>133.0857, 121.9661, 105.0700                                            | C <sub>21</sub> H <sub>38</sub> O <sub>4</sub>                | 4  |
| 74. | 15.65 | Arugosin G           | [M-H] <sup>-</sup> | 491.2434 | 286.0486, 300.0640, 379.1588, 116.927,<br>253.2539, 183.0116                                                       | C <sub>30</sub> H <sub>36</sub> O <sub>6</sub>                | 39 |
| 75. | 15.6  | Linoleic acid        | [M+H] <sup>+</sup> | 281.2474 | 280.2625, 276.2678, 231.1376, 184.0729,<br>171.1374, 144.0804, 133.0856, 123.9642,<br>121.9660, 113.9636, 109.1012 | C <sub>18</sub> H <sub>32</sub> O <sub>2</sub>                | 4  |
| 76. | 16.22 | Versiquinazoline (J) | [M-H] <sup>-</sup> | 382.1772 | 381.1746, 225.2334, 134.8938, 116.9275,<br>115.9198, 100.9249                                                      | C <sub>21</sub> H <sub>25</sub> N <sub>3</sub> O <sub>4</sub> | 20 |

---

## References:

1. M. V. Nguyen, J. W. Han, H. Kim and G. J. Choi, *Acs Omega*, 2022, **7**, 33273-33279.
2. W. J. Zuo, P. F. Jin, W. H. Dong, H. F. Dai and W. L. Mei, *Chin J Nat Med*, 2014, **12**, 151-153.
3. G. D. Chen, D. Hu, M. J. Huang, J. Tang, X. X. Wang, J. Zou, J. Xie, W. G. Zhang, L. D. Guo, X. S. Yao, I. Abe and H. Gao, *Chemical Communications*, 2020, **56**, 4607-4610.
4. E. M. Eliwa, M. M. El-Metwally, A. H. Halawa, A. M. El-Agrody, A. H. Bedair and M. Shaaban, *Journal of Atoms and Molecules*, 2017, **7**, 1045.
5. L. Rahbaek, C. Christophersen, J. Frisvad, H. S. Benggaard, S. Larsen and B. R. Rassing, *Journal of Natural Products*, 1997, **60**, 811-813.
6. H. Han, C. Yu, J. Qi, P. Wang, P. Zhao, W. Gong, C. Xie, X. Xia and C. Liu, *Microb Cell Fact*, 2023, **22**, 60.
7. X. Yang, M. C. Kang, Y. Li, E. A. Kim, S. M. Kang and Y. J. Jeon, *Molecules*, 2017, **22**, 1823.
8. V. Uka, G. G. Moore, N. Arroyo-Manzanares, D. Nebija, S. De Saeger and J. Diana Di Mavungu, *Toxins (Basel)*, 2017, **9**, 35.
9. J. F. Sanchez, R. Entwistle, D. Corcoran, B. R. Oakley and C. C. Wang, *Medchemcomm*, 2012, **3**, 997-1002.
10. D. O. Abonyi, P. M. Eze, C. C. Abba, N. T. Ujam, P. Proksch, F. B. Okoye and C. O. Esimone, 2018, **8**, 157-167.
11. P. Aukamp and C. Holzapfel, *South African Journal of Chemistry*, 1968, **21**, 26-32.
12. H. J. Yan, X. M. Li, C. S. Li and B. G. Wang, *Helvetica Chimica Acta*, 2012, **95**, 163-168.
13. C. C. Wang, Y. M. Chiang, M. B. Praseuth, P. L. Kuo, H. L. Liang and Y. L. Hsu, *Basic Clin Pharmacol Toxicol*, 2010, **107**, 583-589.
14. K. Kong, Z. Huang, S. Shi, W. Pan and Y. Zhang, *BMC Microbiol*, 2023, **23**, 30.
15. F. Song, B. Ren, C. Chen, K. Yu, X. Liu, Y. Zhang, N. Yang, H. He, X. Liu, H. Dai and L. Zhang, *Appl Microbiol Biotechnol*, 2014, **98**, 3753-3758.
16. V. V. Volkov and C. C. Perry, *Dyes and Pigments*, 2021, **195**, 109719.
17. S. S. Zhang, A. O. Zhu, X. Bai, H. J. Zhu and F. Cao, *Chemistry of Natural Compounds*, 2020, **56**, 964-967.
18. T. Q. Cao, Z. Liu, L. Dong, H. Lee, W. Ko, L. B. Vinh, N. Q. Tuan, Y. C. Kim, J. H. Sohn, J. H. Yim, D. S. Lee and H. Oh, *Molecules*, 2022, **27**, 2851.
19. Z. Liu, J. Y. Zhao, S. F. Sun, Y. Li, J. Qu, H. T. Liu and Y. B. Liu, *J Nat Prod*, 2019, **82**, 1063-1071.
20. Z. Cheng, L. Lou, D. Liu, X. Li, P. Proksch, S. Yin and W. Lin, *J Nat Prod*, 2016, **79**, 2941-2952.
21. D. Li, Y. Xu, C. L. Shao, R. Y. Yang, C. J. Zheng, Y. Y. Chen, X. M. Fu, P. Y. Qian, Z. G. She, N. J. Voogd and C. Y. Wang, *Mar Drugs*, 2012, **10**, 234-241.
22. H. Q. Hu, Y. H. Li, Z. W. Fan, W. L. Yan, Z. H. He, T. H. Zhong, Y. B. Gai and X. W. Yang, *Chem Biodivers*, 2022, **19**, e202100804.
23. K. Scherlach and C. Hertweck, *Org Biomol Chem*, 2006, **4**, 3517-3520.
24. Z. J. Lin, G. J. Zhang, T. J. Zhu, R. Liu, H. J. Wei and Q. Q. Gu, *Helvetica Chimica Acta*, 2009, **92**, 1538-1544.
25. F. Y. Lv, A. Mandi, X. M. Li, L. P. Chi, X. Li, B. G. Wang, T. Kurtan and L. H. Meng, *Deep-Sea Res Pt I*, 2023, **195**, 104004.
26. H. Shigemori, S. Wakuri, K. Yazawa, T. Nakamura, T. Sasaki and J. i. Kobayashi, *Tetrahedron*, 1991, **47**, 8529-8534.
27. K. Kito, R. Ookura, S. Yoshida, M. Namikoshi, T. Ooi and T. Kusumi, *Org Lett*, 2008, **10**, 225-228.
28. M. T. Henke, Northwestern University, 2016.
29. D. Xu, J. Ondeyka, G. H. Harris, D. Zink, J. N. Kahn, H. Wang, G. Bills, G. Platas, W. Wang, A. A. Szewczak, P. Liberator, T. Roemer and S. B. Singh, *J Nat Prod*, 2011, **74**, 1721-1730.



30. W. Wang, T. Zhu, H. Tao, Z. Lu, Y. Fang, Q. Gu and W. Zhu, *J Antibiot (Tokyo)*, 2007, **60**, 603-607.
31. D. A. Sumilat, H. Yamazaki, K. Endo, H. Rotinsulu, D. S. Wewengkang, K. Ukai and M. Namikoshi, *J Nat Med*, 2017, **71**, 776-779.
32. M. Shaaban, H. Nasr, T. K. Mohamed, S. F. Mahmoud, M. M. El-Metwally and A. B. Abdelwahab, *Z Naturforsch C J Biosci*, 2023, **78**, 149-156.
33. Z. Y. Wu, F. Liu, S. Y. Ke, Z. G. Zhang, H. T. Hu, W. Fang, S. Y. J. Xiao, Y. N. Zhang, Y. Y. Wang and K. M. Wang, *Plants-Basel*, 2023, **12**, 203.
34. N. Tibashailwa, F. Stephano, D. M. Shadrack, J. J. E. Munissi and S. S. Nyandoro, *Neurotoxicology*, 2023, **94**, 147-157.
35. Y. Zhang, A. Jia, H. Chen, M. Wang, G. Ding, L. Sun, L. Li and M. Dai, *J Antibiot (Tokyo)*, 2017, **70**, 1138-1141.
36. V. M. Dembitsky, T. Rezanka and E. E. Shubina, *Phytochemistry*, 1993, **34**, 1057-1059.
37. H. Nagasawa, A. Isogai, A. Suzuki and S. Tamura, *Agricultural and Biological Chemistry*, 1979, **43**, 1759-1763.
38. X. Li, X. D. Li, X. M. Li, G. M. Xu, Y. Liu and B. G. Wang, *Rsc Advances*, 2017, **7**, 4387-4394.
39. A. Kralj, S. Kehraus, A. Krick, E. Eguereva, G. Kelter, M. Maurer, A. Wortmann, H. H. Fiebig and G. M. König, *J Nat Prod*, 2006, **69**, 995-1000.
